# Supplementary material for: Examining charge transport networks in organic bulk heterojunction photovoltaic diodes using 1/f noise spectroscopy
Source: Royal Society of Chemistry journal article supplement (doi:10.1039/c5tc00348b), 2015-01-01
Supplement: c5tc00348b1.pdf [file c5tc00348b1.pdf]

## Examining Charge Transport Networks in Organic Bulk Heterojunction Photovoltaic Diodes using $1/f$ Noise Spectroscopy

K. Kaku<sup>a</sup>, A.T. Williams<sup>a</sup>, B.G. Mendis<sup>b</sup>, and C. Groves<sup>a\*</sup>,

<sup>a</sup> School of Engineering and Computing Sciences, Durham University, South Road, Durham, DH1 3LE, United Kingdom.

<sup>b</sup> Physics Department, Durham University, South Road, Durham, DH1 3LE, United Kingdom.

\* Email: [chris.groves@durham.ac.uk](mailto:chris.groves@durham.ac.uk)

### Supplementary Information

| $p_{P3HT}$ | P3HT:PCBM<br>weight ratio | CF solution<br>for 90 nm<br>(wt%) | DCB Solution<br>for 90 nm<br>(wt%) |
|------------|---------------------------|-----------------------------------|------------------------------------|
| 0.41       | 1:3                       | 1.1                               | 2.3                                |
| 0.51       | 1:2                       | 1.0                               | 2.2                                |
| 0.63       | 1:1                       | 1.0                               | 2.1                                |
| 0.76       | 2:1                       | 1.0                               | 2.0                                |
| 0.85       | 3:1                       | 0.9                               | 1.9                                |

Table. S1. P3HT:PCBM weight ratio corresponding to  $p_{P3HT}$ . Appropriate concentrations of CF non-annealed and DCB annealed active layers to obtain a thickness of *ca.* 90 nm. Film thicknesses measured by AFM.

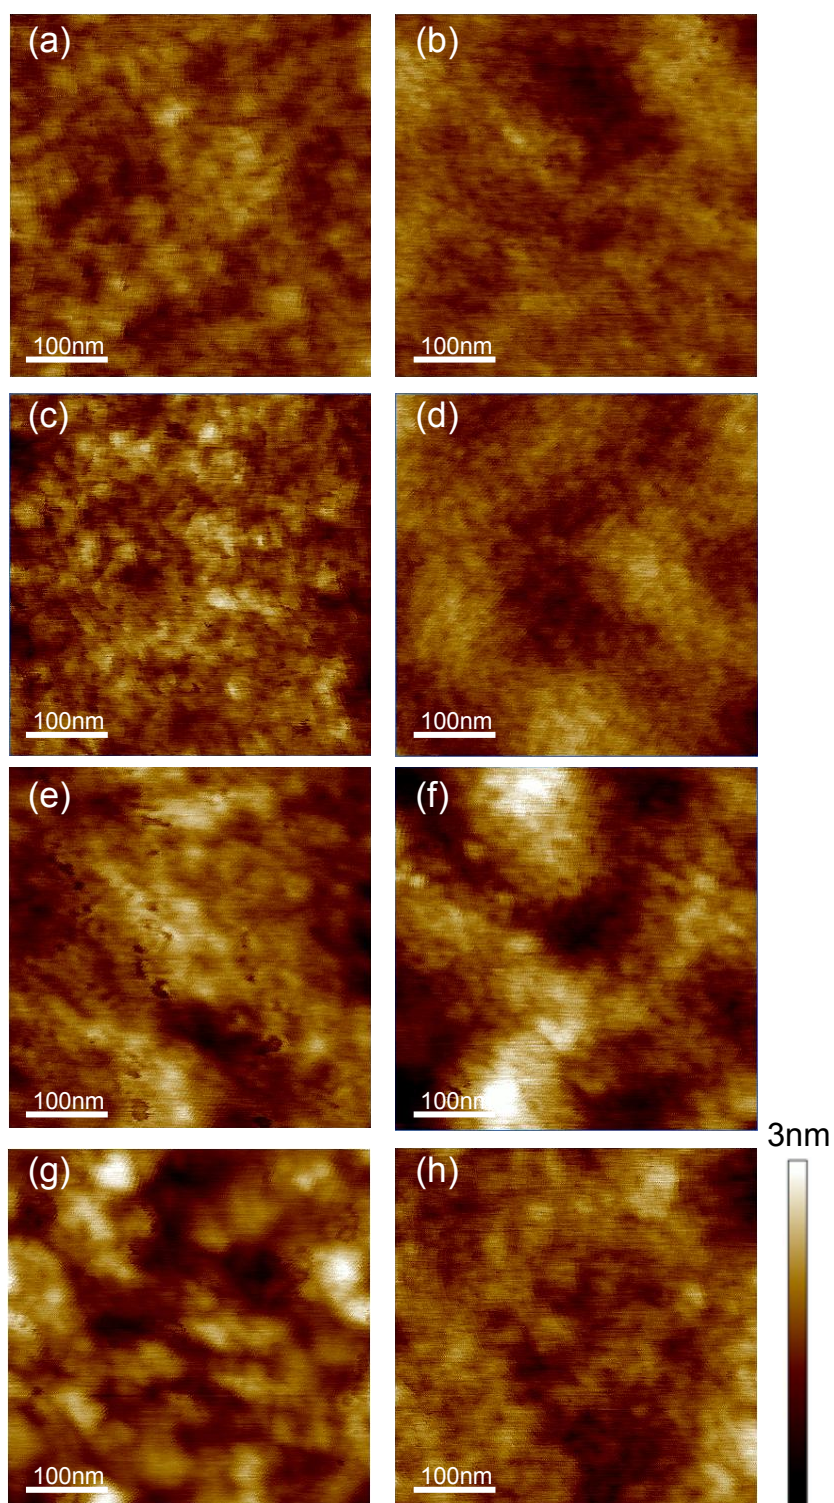

FIG. S2. AFM images of the P3HT:PCBM blends: (a) and (b)  $p_{P3HT} = 0.41$ , (c) and (d)  $p_{P3HT} = 0.51$ , (e) and (f)  $p_{P3HT} = 0.63$ , (g) and (h)  $p_{P3HT} = 0.85$ ; with thermal treatments: left column (a) – (g) corresponds to heterogeneous active layers, while right column (b) – (h) corresponds to homogeneous active layers.

Underlying data files are available to download from the website  
<http://dx.doi.org/10.15128/kk91fk86f>
